# Supplementary material for: The improved killing of both androgen-dependent and independent prostate cancer cells by etoposide loaded SPIONs coupled with NIR irradiation
Source: Royal Society of Chemistry journal article supplement (doi:10.1039/d2bm00107a), 2022-01-01
Supplement: d2bm00107a1.pdf [file d2bm00107a1.pdf]

## Support

# The Improved killing of both androgen-dependent and independent prostate cancer cells with etoposide loaded SPIONs coupled with NIR irradiation

*Kubra Onbasli<sup>a</sup>, Merve Erkisa<sup>b,c</sup>, Gözde Demirci<sup>d</sup>, Abdullah Muti<sup>e</sup>, Engin Ulukaya<sup>b,f</sup>, Alphan*

*Sennaroglu<sup>d,e,g</sup> and Havva Yagci Acar<sup>a,d,g,\*</sup>*

<sup>a</sup>Department of Chemistry, Koc University, Rumelifeneri Yolu, Sariyer, Istanbul 34450, Turkey

<sup>b</sup>Molecular Cancer Research Center, Istinye University, Zeytinburnu, Istanbul 34010, Turkey

<sup>c</sup>Department of Molecular Medicine, Aziz Sancar Institute of Experimental Medicine, Istanbul University, 34390 Istanbul, Turkey

<sup>d</sup>Graduate School of Materials Science and Engineering, Koc University, Rumelifeneri Yolu, Sariyer, Istanbul 34450, Turkey

<sup>e</sup>Department of Physics and Electrical-Electronics Engineering, Koc University, Rumelifeneri Yolu, Sariyer, Istanbul 34450, Turkey

<sup>f</sup>Department of Clinical Biochemistry, Faculty of Medicine, Istinye University, 34010 Istanbul, Turkey

<sup>g</sup>KUYTAM, Koc University Surface Science and Technology Center, 34450 Istanbul, Turkey

\* Author for correspondence:

[fyagci@ku.edu.tr](mailto:fyagci@ku.edu.tr)

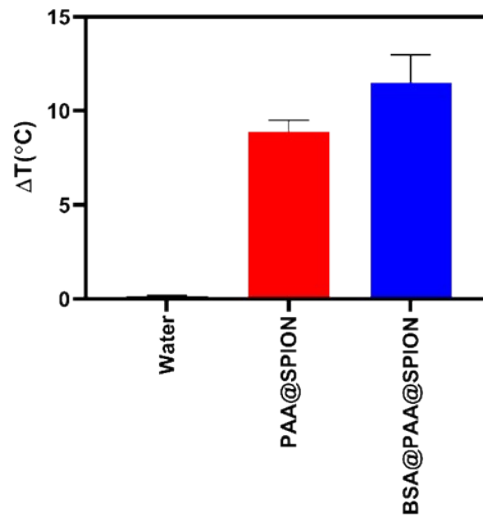

**Figure S1.** Measured temperature increase of water (control), PAA@SPION and BSA@PAA@SPION after 10 min of laser irradiation.

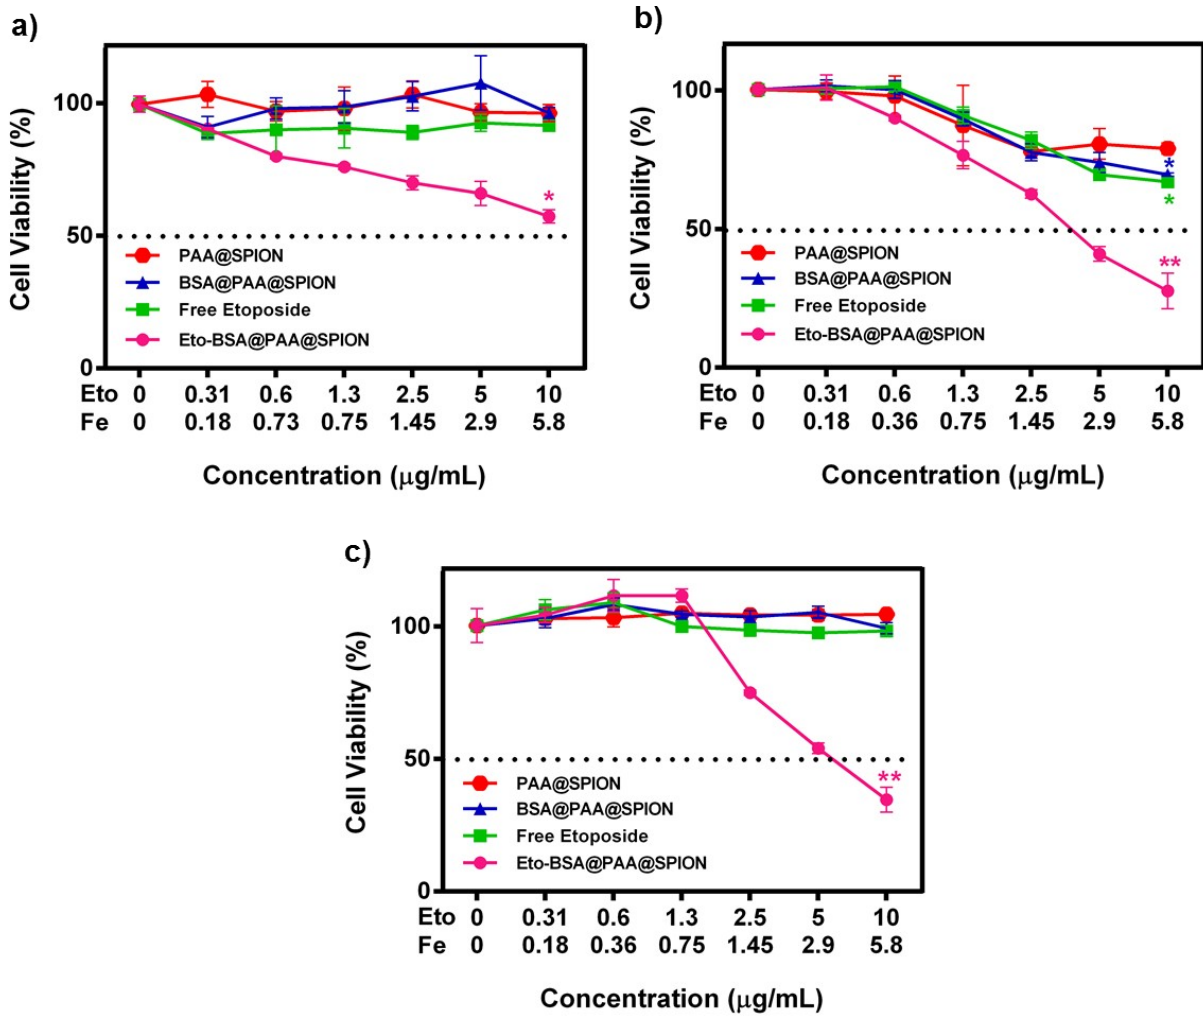

**Figure S2.** Viability of a) LNCaP, b) DU145 and c) PC3 cells treated with free etoposide, PAA@SPION, BSA@PAA@SPION, and Eto-BSA@PAA@SPION after 48 h incubation performed by SRB assay.

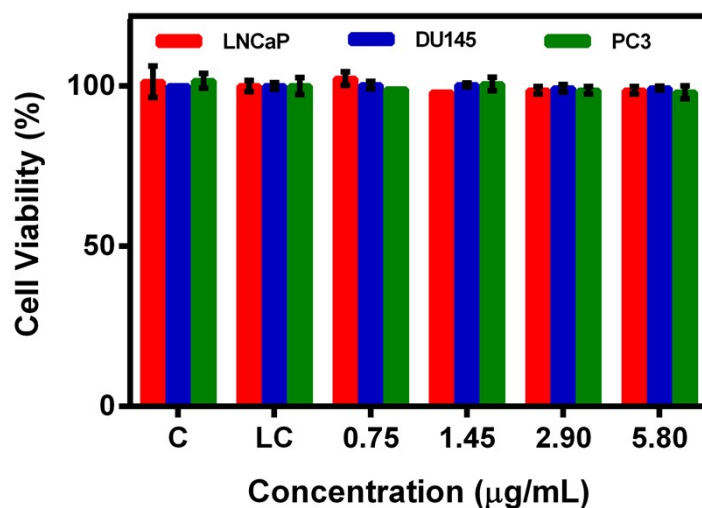

**Figure S3.** Influence of BSA@PAA@SPIONs on LNCaP, DU145, and PC3 cells with laser irradiation at different concentrations. C and LC represent only cell without NP or laser treatment and cells treated with only laser, respectively. All laser experiments were performed at the laser wavelength of 808 nm and intensity of 2.6 W/cm<sup>2</sup> for 10 min.

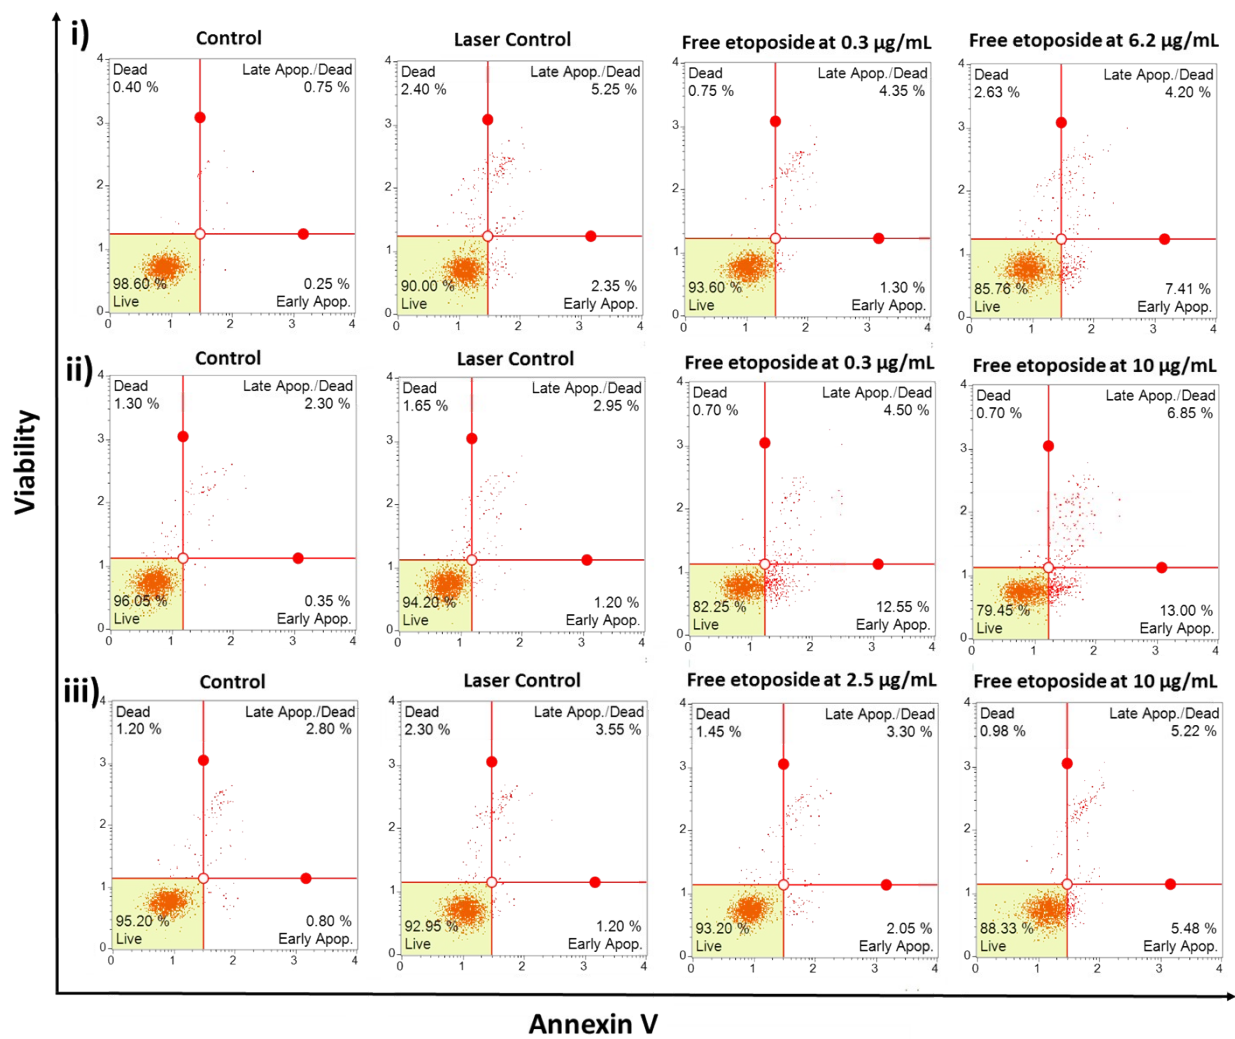

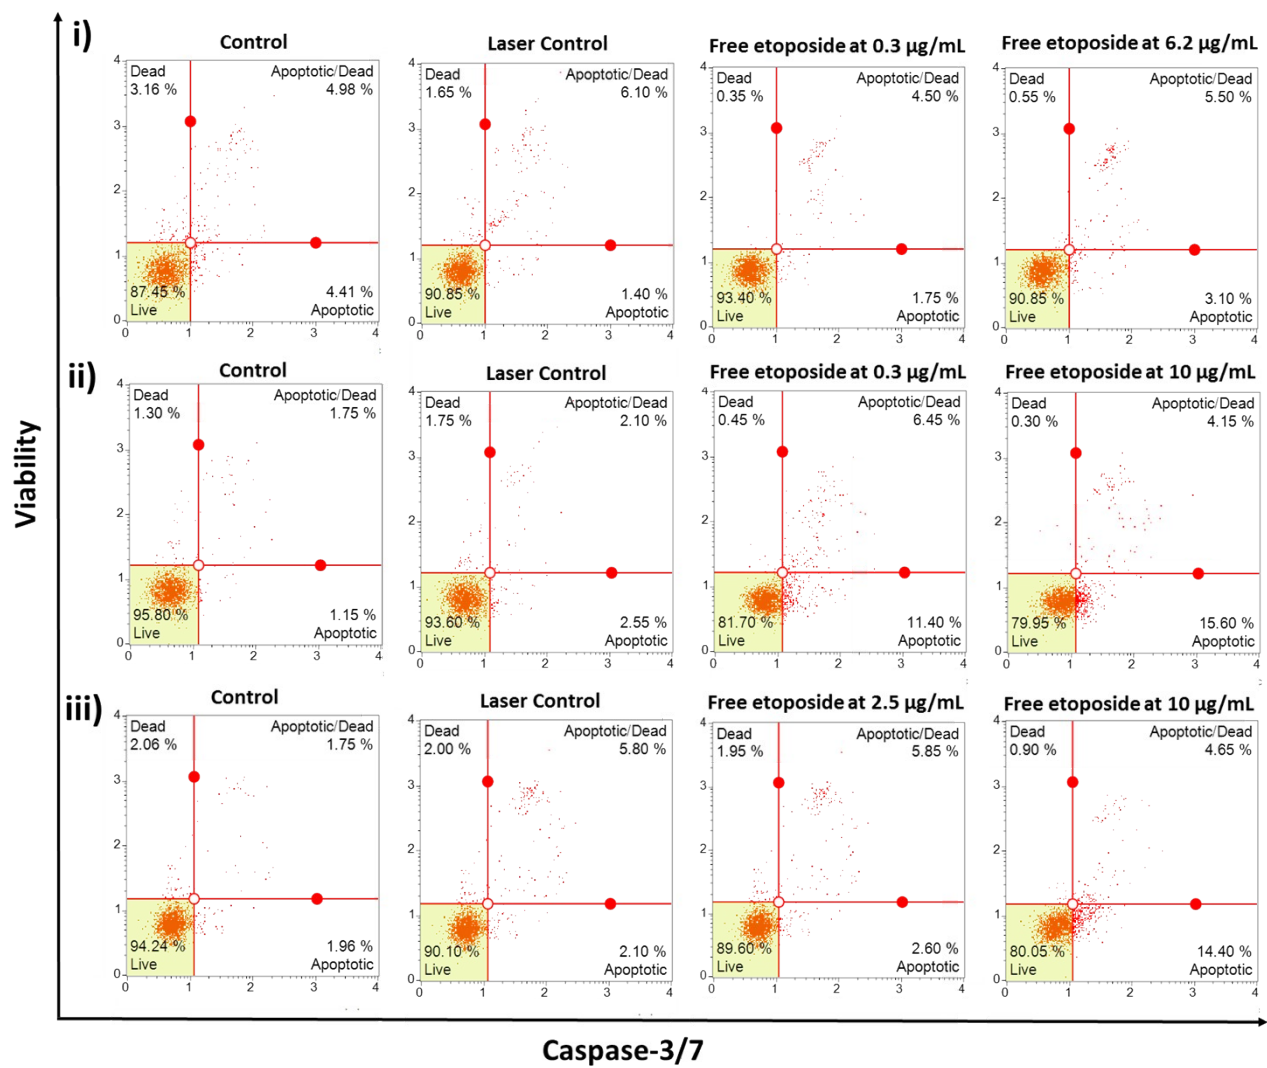

**Figure S5.** Flow cytometry analysis of i) LNCaP, ii) DU145 and iii) PC3 after only laser and free etoposide treatment by Caspase-3/7 assay.

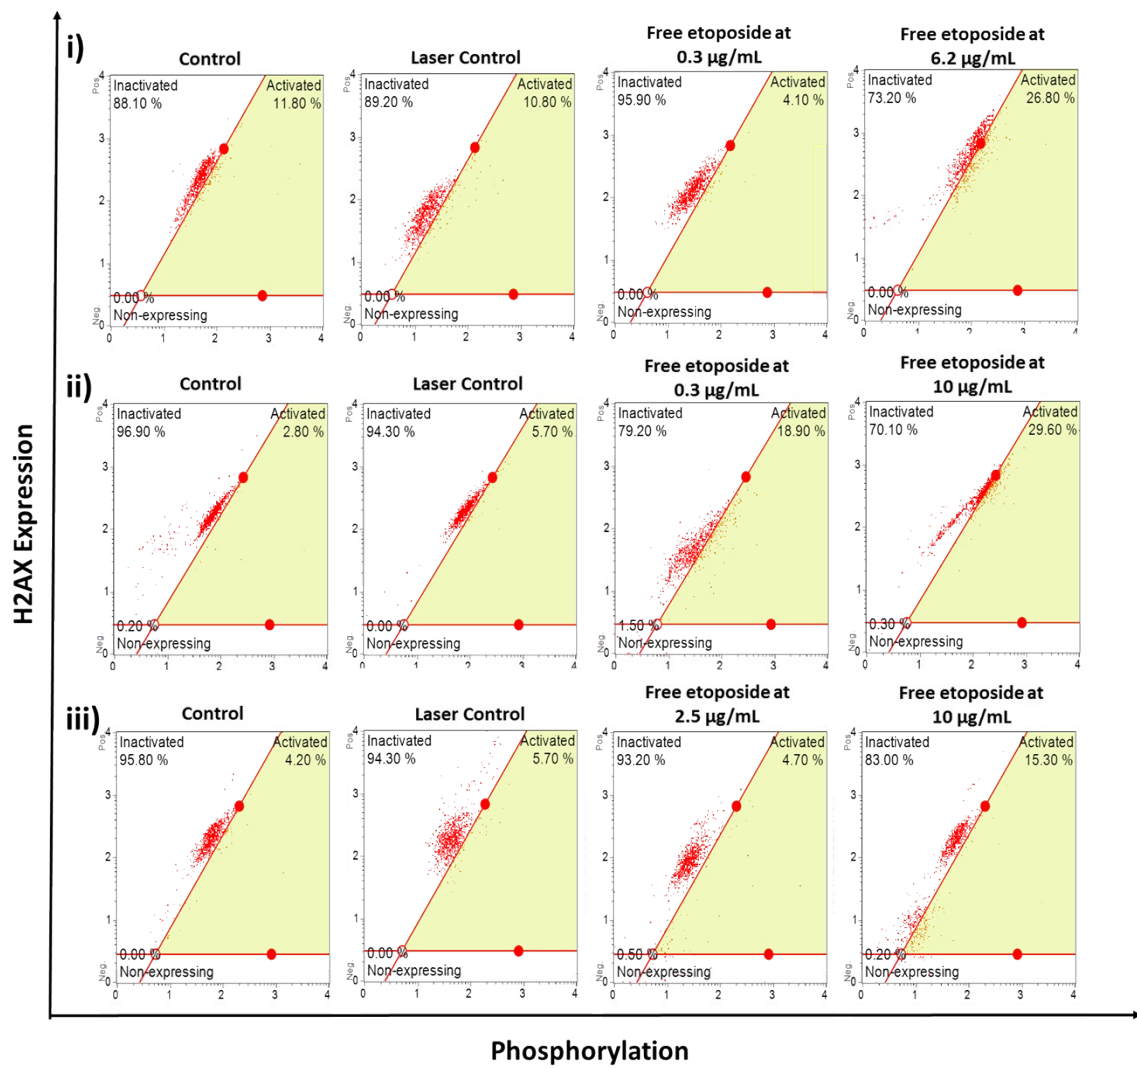

**Figure S6.** The  $\gamma$ H2A.X levels in i) LNCaP, ii) DU145 and iii) PC3 cells after only laser and free etoposide treatment by flow cytometry.

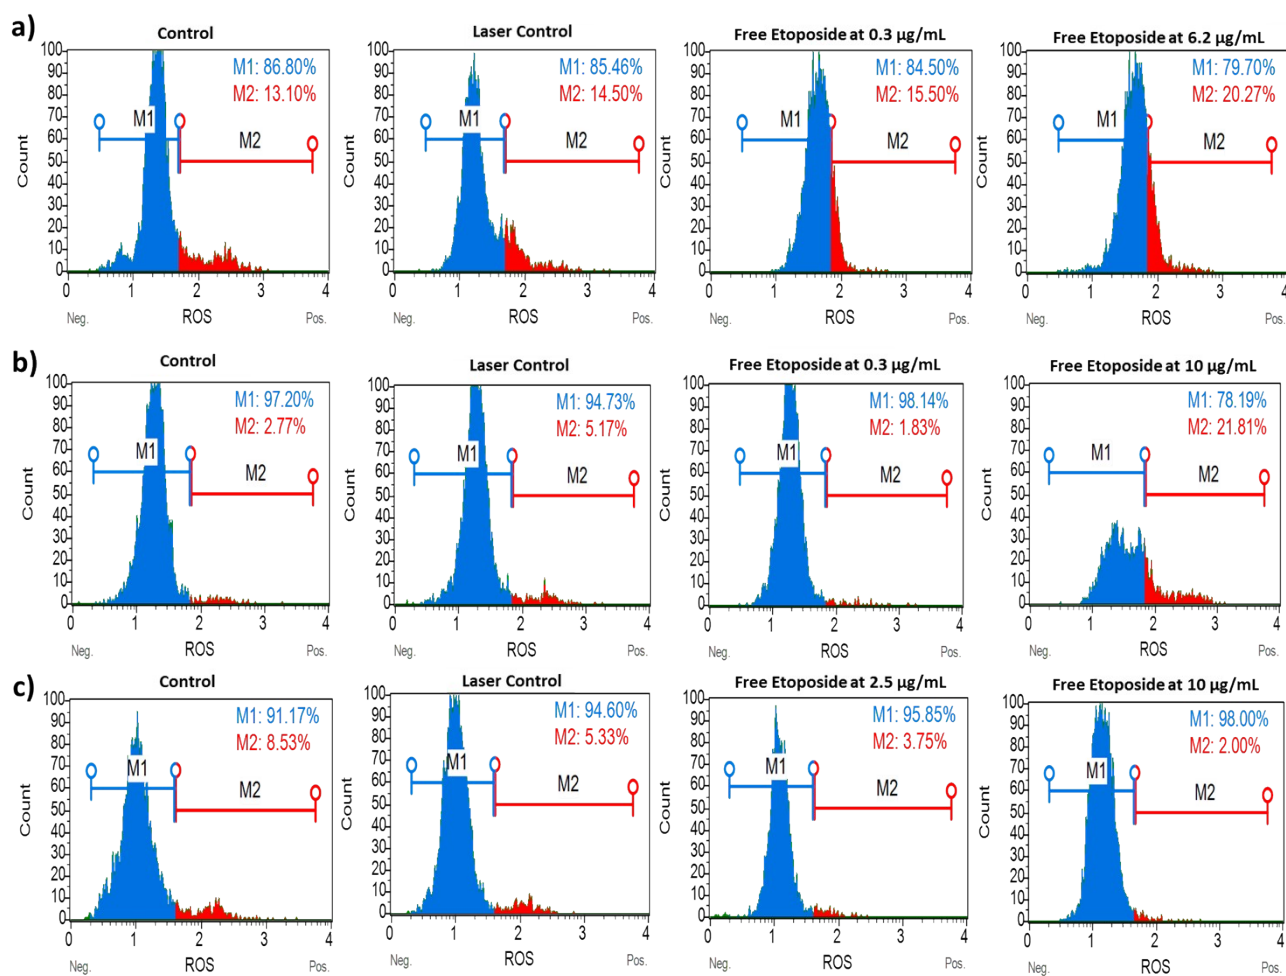

**Figure S7.** ROS generation in i) LNCaP, ii) DU145 and iii) PC3 cells after only laser and free etoposide treatment at different concentrations.
